# Supplementary material for: Conformational properties of 1,4- and 1,5-substituted 1,2,3-triazole amino acids – building units for peptidic foldamers
Source: Royal Society of Chemistry journal article supplement (doi:10.1039/c4ob02359e), 2015-01-01

## Conformational properties of 1,4- and 1,5-substituted 1,2,3-triazole amino acids – building units for peptidic foldamers

Nina Kann,<sup>a\*</sup> Johan R. Johansson<sup>b\*</sup>, Tamás Beke-Somfai<sup>a,c\*</sup>

<sup>a</sup>Department of Chemical and Biological Engineering, Chalmers University of Technology, SE-41296 Göteborg, Sweden. E-mail: beke@chalmers.se; kann@chalmers.se;  
<http://www.chalmers.se/chem/>; Fax: +46-31-7723858; Tel: +46 (0)31 772 3029 (T. Beke-Somfai, Physical Chemistry); +46 (0)31 772 3070 (N. Kann, Organic Chemistry).

<sup>b</sup>AstraZeneca R&D Mölndal, RIA IMED, Medicinal Chemistry, SE-43183 Mölndal. E-mail: johan.x.johansson@astrazeneca.com.

<sup>c</sup>Research Centre for Natural Sciences, Hungarian Academy of Sciences, Pázmány Péter sétány 1, H-1125 Budapest, Hungary.

Correspondence should be addressed to: kann@chalmers.se, johan.x.johansson@astrazeneca.com, beke@chalmers.se.

| Table of contents                                                                               | Page |
|-------------------------------------------------------------------------------------------------|------|
| <b>Table S1.</b> Conformers of 4Tzl as obtained at the RHF/3-21G level of theory.               | S2   |
| <b>Table S2.</b> Conformers of 5Tzl as obtained at the RHF/3-21G level of theory.               | S3   |
| <b>Figure S1.</b> 2D NOESY of BOC-4Tzl ( <b>1</b> )                                             | S4   |
| <b>Figure S2.</b> 2D NOESY of BOC-5Tzl ( <b>2</b> )                                             | S5   |
| <b>Table S3.</b> Analysis of the BOC-5Tzl conformers in view of the 2D NMR<br>NOESY crosspeaks. | S6   |
| <b>NMR spectra.</b> <sup>1</sup> H and <sup>13</sup> C NMR spectra of BOC-4Tzl ( <b>1</b> )     | S7   |
| <b>NMR spectra.</b> <sup>1</sup> H and <sup>13</sup> C NMR spectra of BOC-5Tzl ( <b>2</b> )     | S8   |

**Table S1.** Conformers of 4Tzl as obtained at the RHF/3-21G level of theory.

| Conf. | $\varphi$ | $\theta$ | $\zeta$ | $\rho$ | $\psi$ | $\mu$  | $\Delta E(kcal/mol)$ |
|-------|-----------|----------|---------|--------|--------|--------|----------------------|
| 1     | -73.9     | 69.7     | -179.7  | -178.8 | 101.5  | 35.5   | 0.0                  |
| 2     | -74.0     | 68.1     | 179.4   | 178.9  | -102.7 | -36.3  | 0.0                  |
| 3     | -57.7     | 103.6    | -167.7  | 168.3  | -62.2  | 1.8    | 2.4                  |
| 4     | 179.2     | -178.0   | 179.7   | 178.2  | -97.2  | -37.9  | 3.0                  |
| 5     | -76.4     | 63.4     | -179.6  | -179.1 | -53.2  | -166.9 | 3.5                  |
| 6     | -74.2     | 75.9     | -179.7  | 178.0  | 49.5   | 164.4  | 3.6                  |
| 7     | 175.8     | -175.6   | -179.1  | -175.9 | -41.5  | -160.3 | 4.6                  |
| 8     | -122.8    | 135.6    | 179.2   | 175.8  | 43.2   | 161.2  | 4.8                  |
| 9     | -58.2     | -28.5    | 170.2   | -163.9 | 65.1   | 5.3    | 4.8                  |
| 10    | -120.8    | 32.4     | 179.9   | -177.2 | -45.5  | -162.6 | 4.9                  |
| 11    | -124.7    | 34.5     | 178.4   | 175.5  | 38.2   | 157.7  | 5.6                  |
| 12    | 74.5      | -65.9    | 179.5   | 178.3  | 33.4   | -79.5  | 6.7                  |

**Table S2.** Conformers of 5Tzl as obtained at the RHF/3-21G level of theory.

| <b>Conf.</b> | <i>Sec. struct.</i> | $\varphi$ | $\theta$ | $\zeta$ | $\rho$ | $\psi$ | $\Delta E(kcal/mol)$ |
|--------------|---------------------|-----------|----------|---------|--------|--------|----------------------|
| 1            | H14                 | -111.9    | 55.3     | -4.8    | -94.5  | -48.3  | 0.00                 |
| 2            | C8                  | 93.8      | 62.4     | -3.5    | -84.6  | -61.4  | 1.31                 |
| 3            | Turn                | -101.3    | 68.7     | -3.3    | -93.1  | -146.3 | 2.87                 |
| 4            | 2-Helix             | -88.9     | 93.1     | 3.5     | 71.1   | 151.1  | 3.27                 |
| 5            | H8                  | 164.3     | -48.6    | 4.3     | 95.1   | 122.6  | 3.28                 |
| 6            | H8b                 | 102.4     | 30.0     | -5.8    | 68.7   | 65.1   | 3.78                 |
| 7            | Spiral              | -91.0     | 93.2     | 4.8     | 92.1   | 43.2   | 3.88                 |
| 8            | H10                 | -100.6    | 84.3     | 2.3     | 69.6   | -111.3 | 3.98                 |
| 9            |                     | 85.8      | 98.6     | 3.5     | -69.6  | -151.9 | 4.03                 |
| 10           | H10/Turn2           | -70.7     | 147.3    | 4.3     | -75.4  | 9.5    | 4.50                 |
| 11           |                     | -133.9    | 39.4     | -11.4   | 58.2   | 33.3   | 4.70                 |
| 12           | Turn                | -69.6     | 107.0    | 3.8     | -137.2 | 62.9   | 6.04                 |
| 13           |                     | 77.7      | 100.6    | 1.99    | 72.1   | 60.7   | 6.26                 |
| 14           | S                   | 111.1     | 169.9    | -2.8    | -90.9  | -44.6  | 6.38                 |
| 15           |                     | -77.6     | 148.6    | -3.0    | -64.5  | -56.0  | 6.75                 |
| 16           |                     | 111.4     | 168.6    | 2.5     | 92.3   | 37.0   | 6.77                 |
| 17           | H20                 | -154.6    | 62.7     | 2.5     | 98.5   | 33.9   | 6.93                 |
| 18           |                     | -116.0    | -83.3    | -4.5    | 81.7   | 20.0   | 7.33                 |
| 19           | Ext                 | -105.9    | -176.7   | -0.7    | 71.0   | 155.7  | 7.35                 |
| 20           |                     | 124.1     | 156.1    | 0.5     | 63.6   | 158.8  | 9.02                 |
| 21           |                     | 180.0     | 180.0    | 0.0     | 180.0  | 0.0    | 13.45                |
| 22           |                     | 180.0     | 0.0      | 0.0     | 180.0  | 0.0    | 19.16                |
| 23           |                     | 180.0     | 180.0    | 0.0     | 0.0    | 180.0  | 19.81                |
| 24           |                     | 0.0       | 180.0    | 0.0     | 180.0  | 0.0    | 21.49                |
| 25           |                     | 180.0     | 180.0    | 0.0     | 180.0  | 180.0  | 24.61                |
| 26           |                     | 180.0     | 180.0    | 0.0     | 0.0    | 0.0    | 30.76                |
| 27           |                     | 0.0       | 0.0      | 0.0     | 180.0  | 0.0    | 36.88                |

**Figure S1.** 2D NOESY of BOC-4Tzl (**1**)

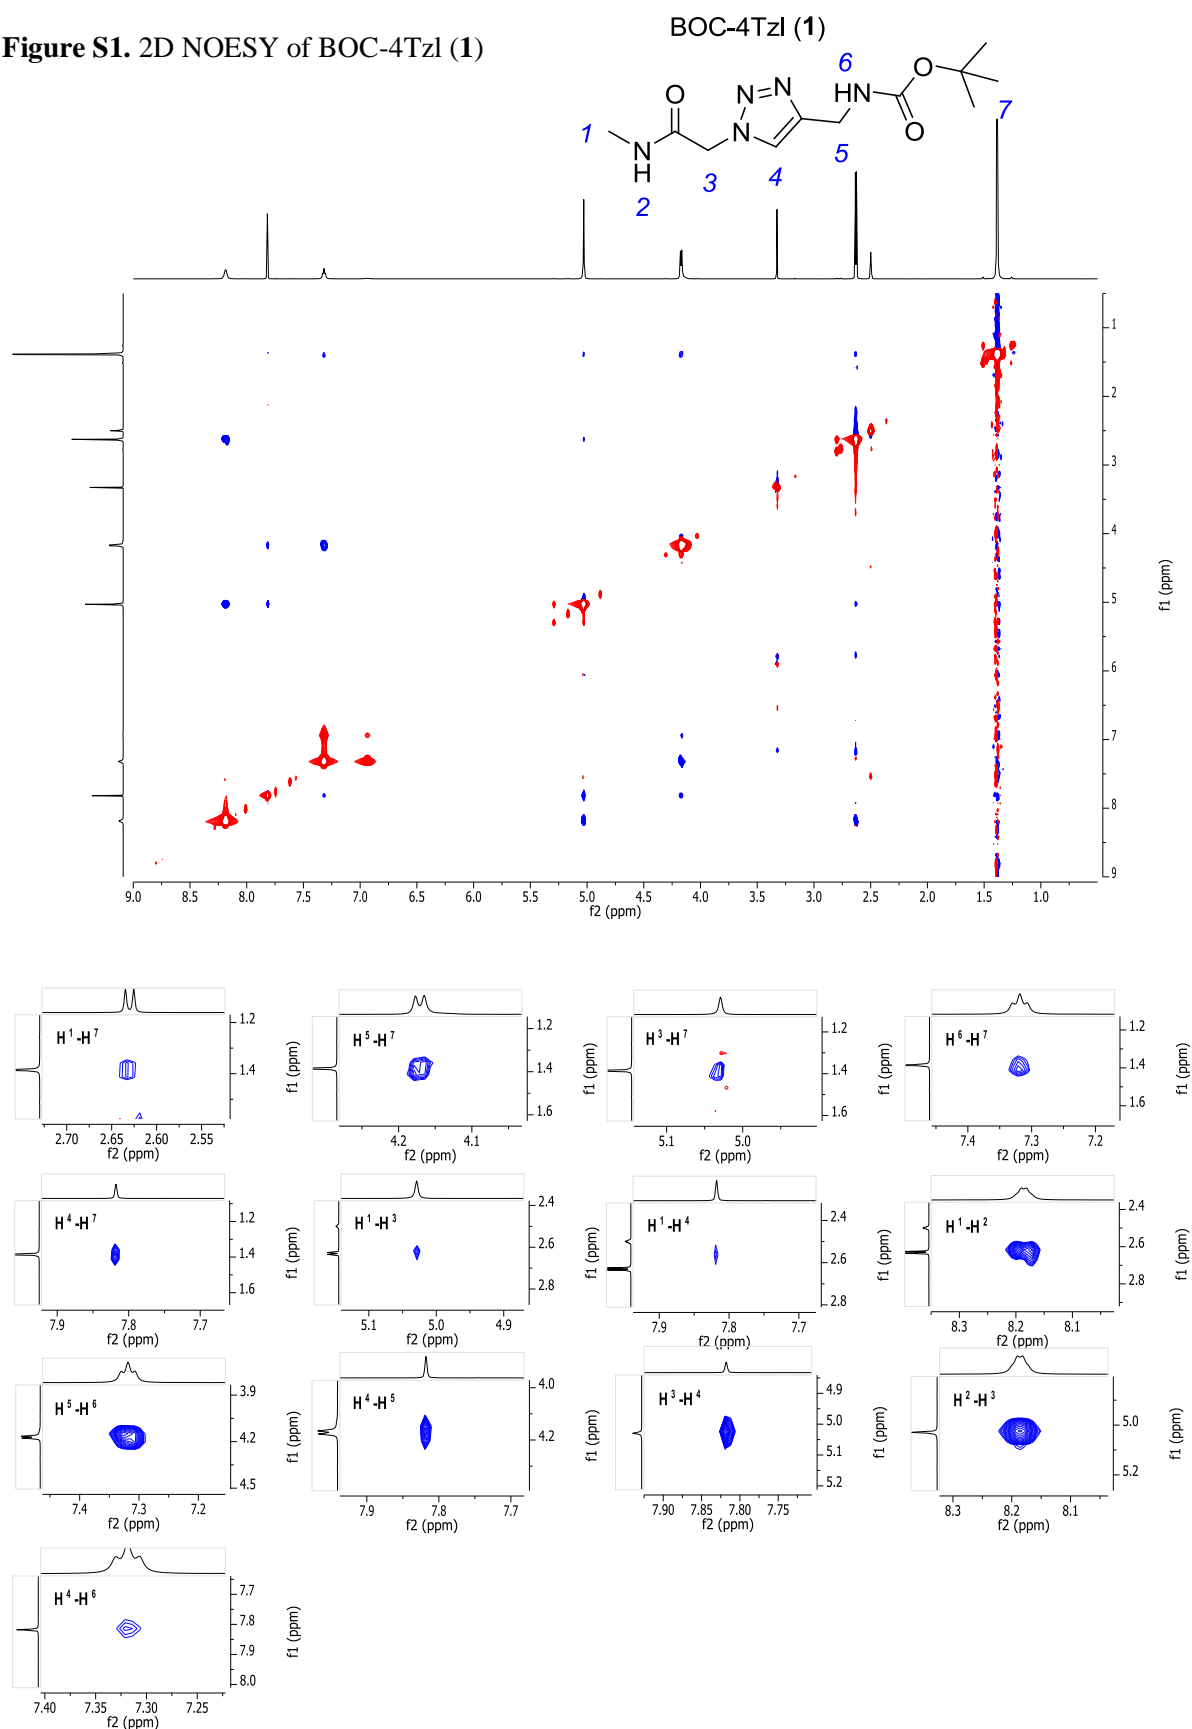

**Figure S2.** 2D NOESY of BOC-5Tzl (**2**)

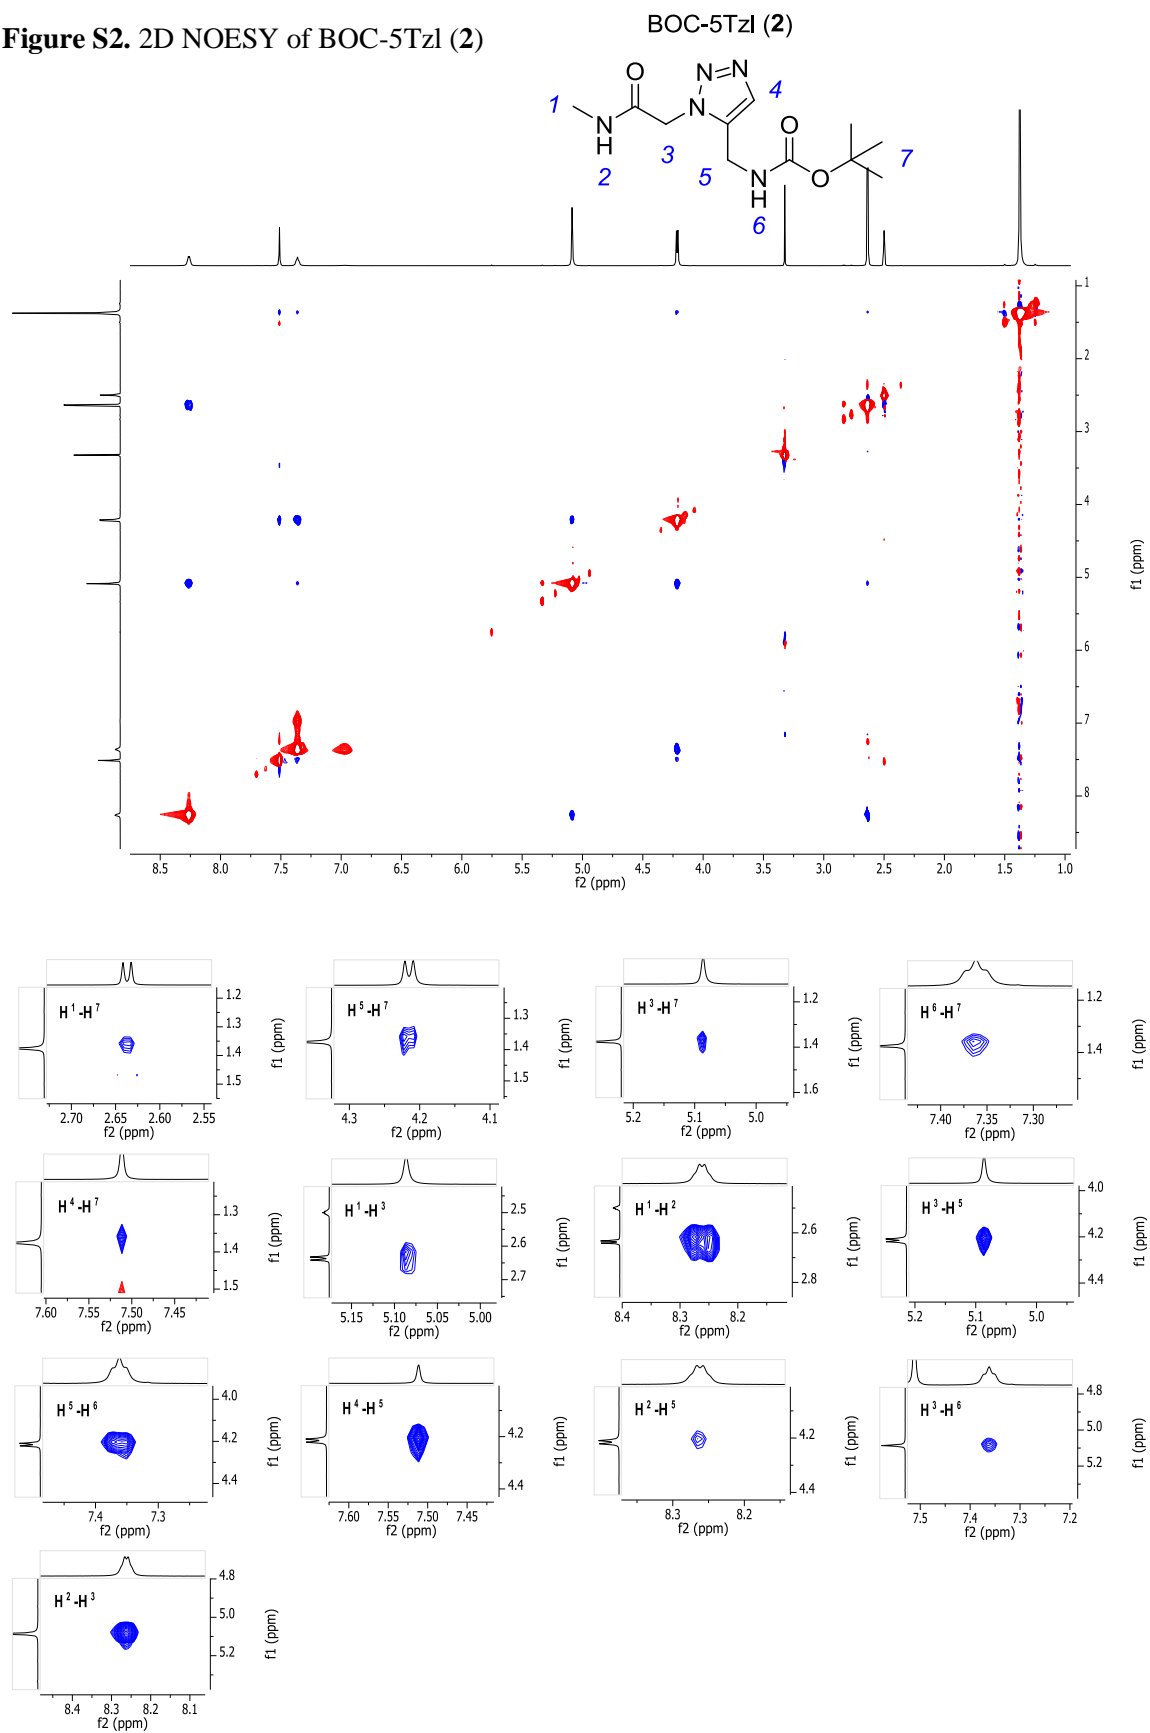

**Table S3.** Analysis of the BOC-5Tzl conformers in view of the 2D NMR NOESY crosspeaks. Presence or absence of each obtained crosspeak is marked for each conformer obtained for BOC-5Tzl by calculations. For more details see Table 5 and main text.

| Conf.       | NOE H-H Crosspeaks <sup>b</sup> |                                |                                |                                |                                |                                |                                | Comments                                                 | Rel. En. <sup>c</sup> |
|-------------|---------------------------------|--------------------------------|--------------------------------|--------------------------------|--------------------------------|--------------------------------|--------------------------------|----------------------------------------------------------|-----------------------|
|             | H <sup>1</sup> -H <sup>7a</sup> | H <sup>2</sup> -H <sup>5</sup> | H <sup>3</sup> -H <sup>6</sup> | H <sup>3</sup> -H <sup>7</sup> | H <sup>4</sup> -H <sup>6</sup> | H <sup>4</sup> -H <sup>7</sup> | H <sup>5</sup> -H <sup>7</sup> |                                                          |                       |
| BOC-5Tzl-1  | X                               | X                              | X                              | X                              | X                              | -                              | -                              | 2-6: 2.9Å (missing from NOEs)                            | LOW                   |
| BOC-5Tzl-2  | X                               | -                              | X                              | X                              | -                              | -                              | -                              |                                                          | LOW                   |
| BOC-5Tzl-3  | X                               | X                              | X                              | X                              | X                              | -                              | X                              | 2-7: 2.7Å (missing from NOEs)                            | LOW                   |
| BOC-5Tzl-4  | -                               | -                              | X                              | X                              | X                              | -                              | -                              |                                                          | MODERATE              |
| BOC-5Tzl-6  | -                               | X                              | X                              | X                              | -                              | -                              | -                              | 1-5: 3.2Å (missing from NOEs), H-bond fixes the distance | HIGH                  |
| BOC-5Tzl-7  | -                               | X                              | X                              | X                              | X                              | -                              | -                              |                                                          | MODERATE              |
| BOC-5Tzl-8  | -                               | X                              | X                              | X                              | X                              | -                              | -                              | 2-7: 3.4Å (missing from NOEs), H-bond fixes the distance | LOW                   |
| BOC-5Tzl-10 | X                               | X                              | -                              | -                              | X                              | X                              | -                              |                                                          | LOW                   |
| BOC-5Tzl-14 | -                               | X                              | -                              | -                              | X                              | X                              | -                              |                                                          | HIGH                  |

<sup>a</sup> For numbering of protons in BOC-5Tzl see Figure S2.

<sup>b</sup> Only those crosspeaks were considered which, based on the structural analysis of conformers, should not appear for every conformer obtained by calculations.

<sup>c</sup> Relative energy range based on values obtained for BOC-5Tzl (Table 5 in main text).

# <sup>1</sup>H and <sup>13</sup>C spectra of BOC-4Tzl (1)

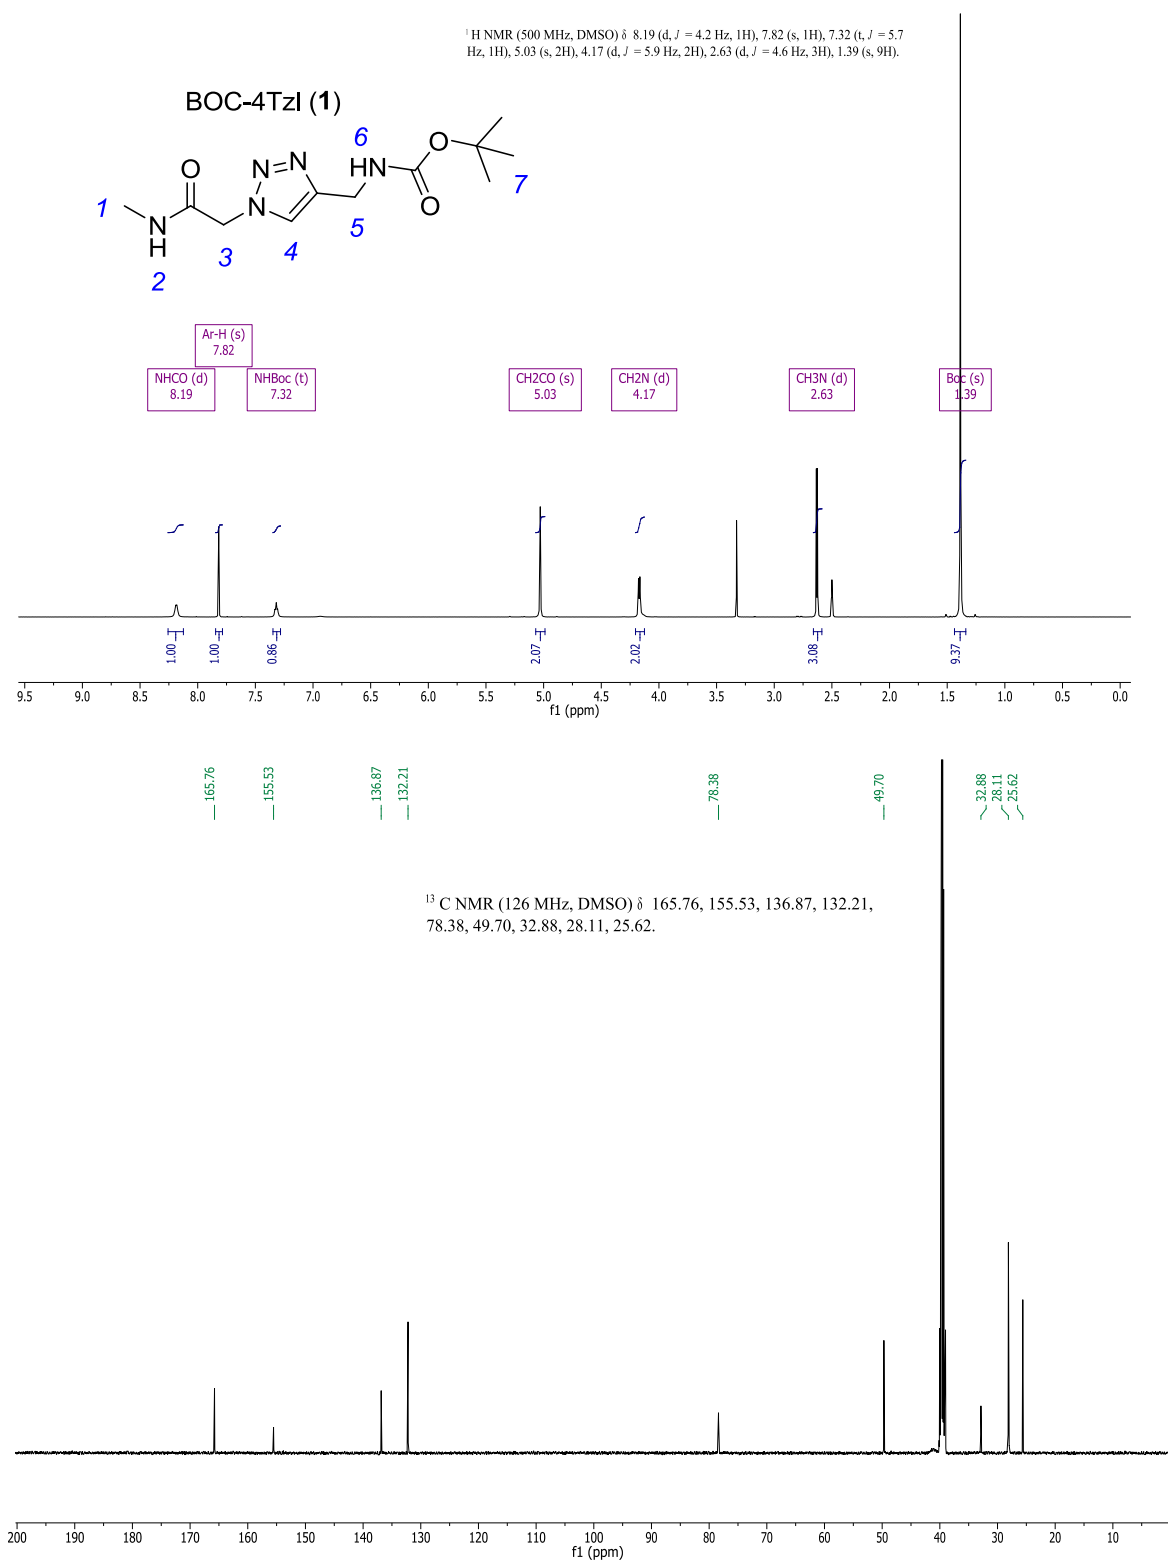

# <sup>1</sup>H and <sup>13</sup>C spectra of BOC-5Tzl (2)

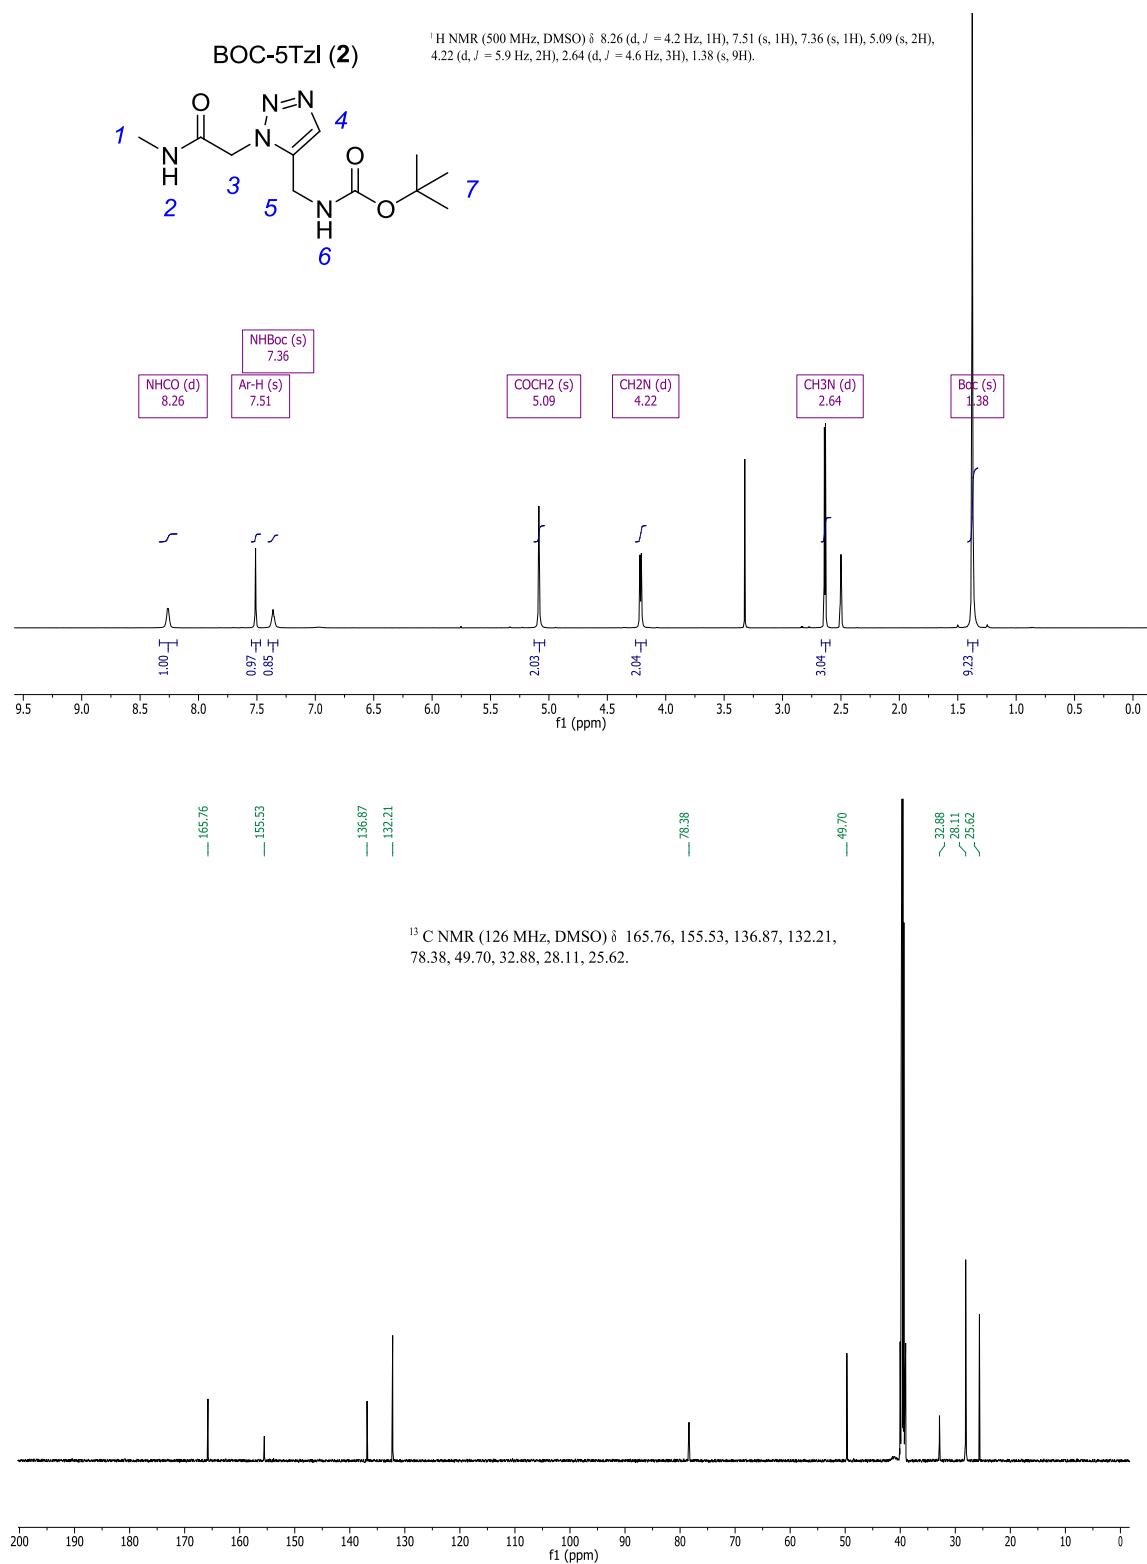

Supplement: c4ob02359e1.pdf [file c4ob02359e1.pdf]
